# Supplementary material for: Enhancing photothermal conversion of spinel zinc cobalt oxide through lattice distortion regulation
Source: Royal Society of Chemistry journal article supplement (doi:10.1039/d5ta07675g), 2025-01-01
Supplement: d5ta07675g1.pdf [file d5ta07675g1.pdf]

# Electronic Supplementary Information

## **Enhancing photothermal conversion of spinel zinc cobalt oxide through lattice distortion regulation**

Huilan Ma<sup>a,b,II</sup>, Shengyang Wang<sup>a,b,II</sup>, Qi Ye<sup>a</sup>, Xiaoping Tao<sup>c</sup>, Can Li<sup>a,b,\*</sup>

<sup>a</sup> *State Key Laboratory of Catalysis, Dalian Institute of Chemical Physics, Chinese Academy of Sciences, Dalian National Laboratory for Clean Energy, Dalian 116023, China. University of Chinese Academy of Sciences, Beijing 100049, China*

<sup>b</sup> *University of Chinese Academy of Sciences, Beijing 100049, China.*

<sup>c</sup> *Chongqing University, Chongqing 401331, China.*

<sup>\*</sup>Corresponding author.

II: Shows the same contributed equally to the manuscript

---

## Table of contents

### 1. Experimental details

### 2. Supplementary Figures

Figure S1. Fitting patterns of  $\mu_{eff}$  (a)  $\mu_{eff}$  of ZCO-300°C (b)  $\mu_{eff}$  of ZCO-400°C (c)  $\mu_{eff}$  of ZCO-500°C (d)  $\mu_{eff}$  of ZCO-600°C.

Figure S2. Tauc plot  $(\alpha E)^2$  versus photon energy E for ZnCo<sub>2</sub>O<sub>4</sub>.

Figure S3. Fitting diagrams of thermal diffusivities of (a) ZCO-300°C and (b) ZCO-400°C (c) ZCO-500°C (d) ZCO-600°C.

Figure S4. Photothermal stability of samples under repeated illumination cycles.

### 3. Supplementary Tables

Table S1. Rietveld refinement results of ZnCo<sub>2</sub>O<sub>4</sub> samples Volume of the unit cell (V), and agreement factors (R) for ZnCo<sub>2</sub>O<sub>4</sub> samples.

Table S2. Rietveld refinement results of ZnCo<sub>2</sub>O<sub>4</sub> samples Co-O bond length R in CoO<sub>6</sub> octahedron site of ZnCo<sub>2</sub>O<sub>4</sub>.

Table S3. Magnetic parameter of ZnCo<sub>2</sub>O<sub>4</sub> samples  $\mu_{eff}$  and HS/LS of ZnCo<sub>2</sub>O<sub>4</sub>.

Table S4. DFT calculation of ZnCo<sub>2</sub>O<sub>4</sub> samples· MAGAMOM, Co-O bond length, cell volume, spin state and Jahn-Teller distortion  $\Delta$  in CoO<sub>6</sub> octahedron site of ZnCo<sub>2</sub>O<sub>4</sub>.

Table S5. Bandgap calculation of samples.

Table S6. Evaluation of photothermal efficiencies of ZnCo<sub>2</sub>O<sub>4</sub>.

## 1. Experimental details

### Materials characterization

X-ray diffractometer (XRD) tests were performed on a SmartLab diffractometer using a Cu K $\alpha$  radiation source ( $\lambda=1.54056\text{\AA}$ ) to determine the crystal structure. Raman was characterized by Renishaw inVia Raman microscope ( $\lambda=532\text{nm}$ ), and the laser intensity is 0.2mW. The morphologies were characterized by Scanning Electron Microscope (SEM, FEI Quanta 200F). The macroscopic absorption and intrinsic absorption of powder samples were carried out by Cary 5000 with integrating sphere. The surface temperature under photothermal conversion test was imaged by IR camera (Fluke Thermography).

### Materials

Zn(NO<sub>3</sub>)<sub>2</sub>•6H<sub>2</sub>O(AR), Co(NO<sub>3</sub>)<sub>2</sub>•6H<sub>2</sub>O, Ethanol(AR), Cu films

### Sample preparation

Synthesis of ZnCo<sub>2</sub>O<sub>4</sub> spinel. First, dissolved Zn (NO<sub>3</sub>)<sub>2</sub>•6H<sub>2</sub>O(1.203g) in ethanol (10mL) and stirred for about 10 minutes to obtain a colorless solution. The ethanol solution of Co (NO<sub>3</sub>)<sub>2</sub>•6H<sub>2</sub>O (2.355g, 15ml) was added dropwise to the obtained solution, and then stirred rapidly at room temperature for more than 6 hours to obtain a deep purple solution. Then slowly heat the solution to 40°C, 60°C, and 80°C, and maintain each temperature step for 2 hours with stirring. Finally, the homogeneous solution is dried at 100°C for 2 hours to obtain black shiny powder. The obtained powder was calcined at different temperatures from 350 to 600°C for 2 hours to further characterize its structure.

### Coatings for photothermal conversion efficiency.

0.5g of ZnCo<sub>2</sub>O<sub>4</sub> powders were dissolved in 10ml of ethanol. Then ball-milled for 3 hours for spray coating. Then using the above ink to spray on the Cu films.

### Photothermal conversion efficiency of coatings.

Then we conducted the photothermal tests of ZnCo<sub>2</sub>O<sub>4</sub> oxides films under irradiation of a concentrated Xe lamp (P = 1.46 W), which has an irradiation spectrum similar to solar irradiation.

## Calculation Details

All the ground state properties are calculated using the Vienna Ab Initio Simulation Package (VASP). Electron-ion interactions are described by using the all-electron projector augmented wave (PAW) method. The generalized gradient approximation (GGA) with the Perdew-Burke-Ernzerhof (PBE) exchange-correlation functional is used to approximate correlation of electrons within the many-body wave function. All calculations are performed using a cut-off energy of 520 eV with the  $2 \times 2 \times 7$  Monkhorst-Pack grids. The calculations are stopped until the force less than 0.01 eV/Å, and the energy convergence criterion is set to  $10^{-8}$  eV.

## 2. Supplementary Figures

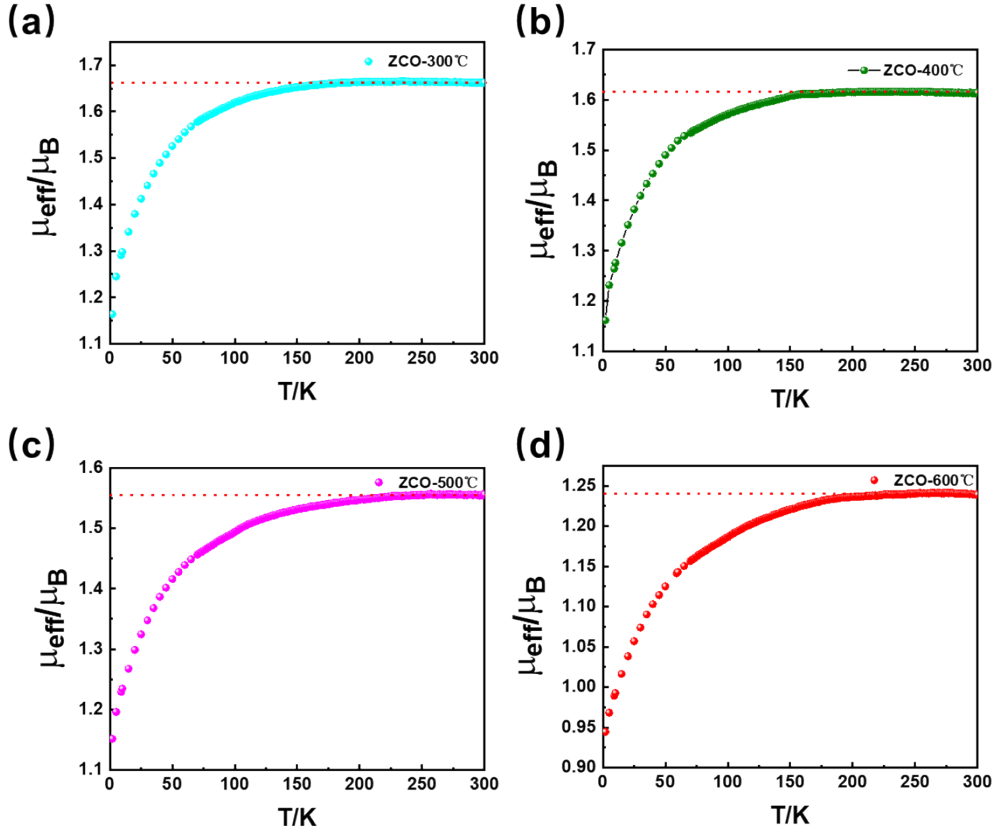

**Figure S1.** Fitting patterns of  $\mu_{eff}$ . (a)  $\mu_{eff}$  of ZCO-300°C (b)  $\mu_{eff}$  of ZCO-400°C (c)  $\mu_{eff}$

$$f_{HS} = \frac{u_{effect}^2 - u_{LS}^2}{u_{HS}^2 - u_{LS}^2} \quad f_{LS} = 1 - f_{HS}$$

$f_{HS}$  means high spin fraction,  $f_{LS}$  means low spin fraction,  $u_{effect}$  means effective magnetic moment.

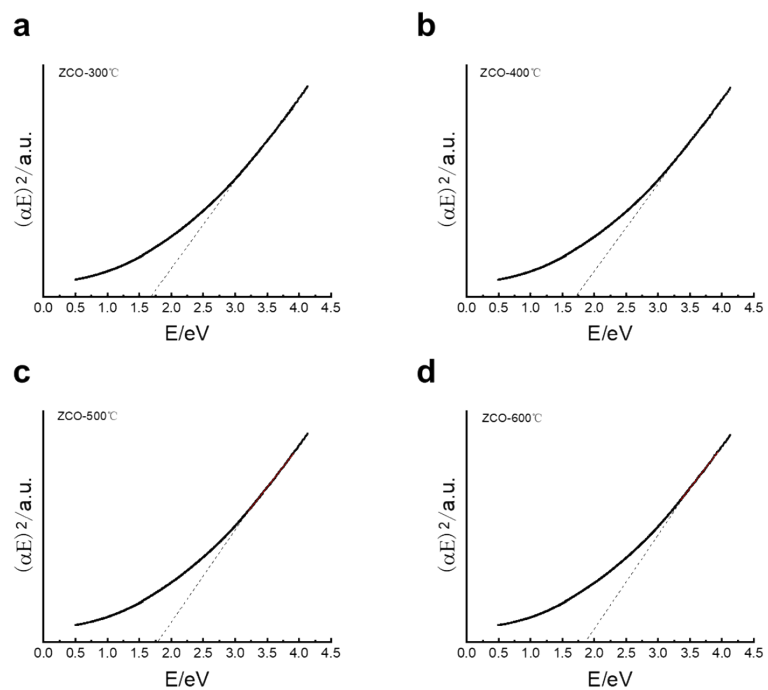

**Figure S2. Tauc plot  $(\alpha E)^2$  versus photon energy  $E$  for  $\text{ZnCo}_2\text{O}_4$ .**

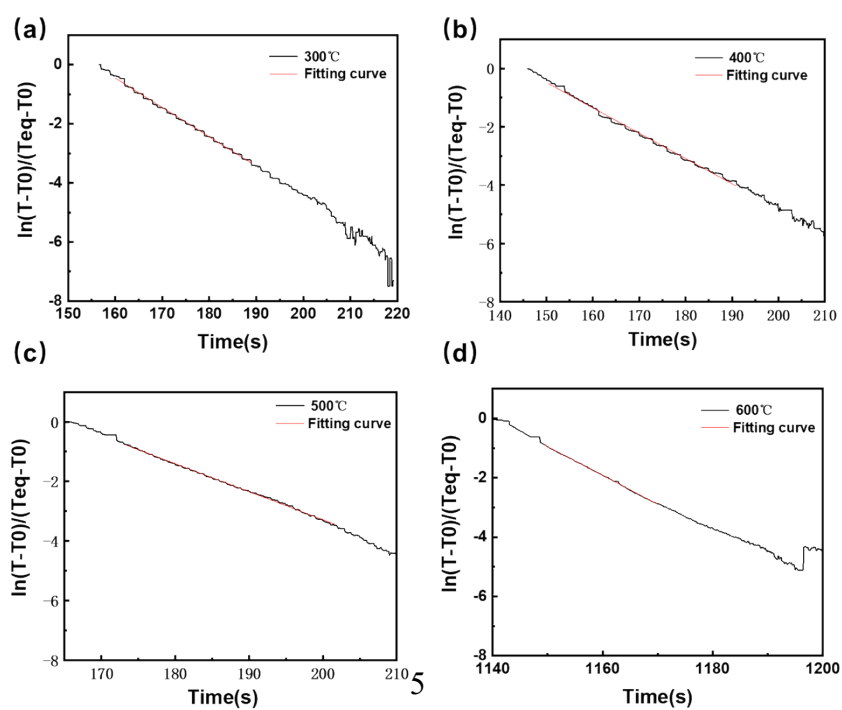

**Figure S3. Fitting diagrams of thermal diffusivities of (a) ZCO-300°C and (b) ZCO-400°C (c) ZCO-500°C (d) ZCO-600°C.**

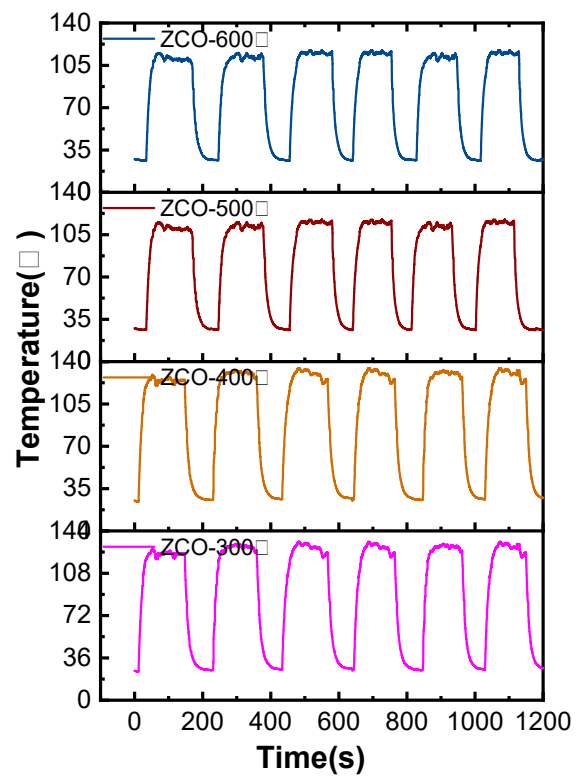

Figure S4. Photothermal stability of samples under repeated illumination cycles.

### 3. Supplementary Tables

**Table S1. Rietveld refinement results of  $\text{ZnCo}_2\text{O}_4$  samples** Volume of the unit cell ( $V$ ), and agreement factors ( $R$ ) for  $\text{ZnCo}_2\text{O}_4$  samples.

|           | Rp(%) | Rwp(%) | V(g/cm <sup>3</sup> ) |
|-----------|-------|--------|-----------------------|
| ZCO-300°C | 1.67  | 2.15   | 532.1498              |
| ZCO-400°C | 1.64  | 2.11   | 532.0275              |
| ZCO-500°C | 1.70  | 2.22   | 531.0605              |
| ZCO-600°C | 1.66  | 2.27   | 530.6511              |

**Table S2. Rietveld refinement results of  $\text{ZnCo}_2\text{O}_4$  samples** Co-O bond length  $R$  in  $\text{CoO}_6$  octahedron site of  $\text{ZnCo}_2\text{O}_4$ .

|            | R1(Å)   | R2(Å)   | R3(Å)   | R4(Å)   | R5(Å)   | R6(Å)   | $\Delta$ |
|------------|---------|---------|---------|---------|---------|---------|----------|
| ZCO-300 °C | 2.06041 | 2.06041 | 2.06041 | 2.06041 | 2.06041 | 2.06041 | 6.2E-3   |
| ZCO-400 °C | 2.06026 | 2.06026 | 2.06026 | 2.06026 | 2.06026 | 2.06026 | 6.1E-3   |
| ZCO-500 °C | 2.05901 | 2.05901 | 2.05901 | 2.05901 | 2.05901 | 2.05901 | 6.0E-3   |
| ZCO-600 °C | 2.00520 | 2.00520 | 2.00520 | 2.00520 | 2.00520 | 2.00520 | 5.5E-3   |

**Table S3. Magnetic parameter of  $\text{ZnCo}_2\text{O}_4$  samples**  $\mu_{eff}$  and HS/LS of  $\text{ZnCo}_2\text{O}_4$ .

|                   | ZCO-300 °C  | ZCO-400 °C  | ZCO-500 °C  | ZCO-600 °C  |
|-------------------|-------------|-------------|-------------|-------------|
| $\mu_{eff}/\mu_B$ | 1.66361     | 1.61508     | 1.55515     | 1.24017     |
| HS/LS             | 34%HS+66%LS | 33%HS+67%LS | 32%HS+68%LS | 25%HS+75%LS |

**Table S4. DFT calculation of ZnCo<sub>2</sub>O<sub>4</sub> samples**· MAGAMOM,Co-O bond length, cell volume, spin state and Jahn-Teller distortion  $\Delta$  in CoO<sub>6</sub> octahedron site of ZnCo<sub>2</sub>O<sub>4</sub>.

| input<br>MAGMOM of<br>Co | output<br>MAGMOM of<br>Co                                    | Co-O<br>bond 1<br>(Å)                               | Co-O<br>bond 2<br>(Å) | Co-O<br>bond 3<br>(Å) | cell volume<br>(Å <sup>3</sup> ) | spin<br>state | $\Delta$ |
|--------------------------|--------------------------------------------------------------|-----------------------------------------------------|-----------------------|-----------------------|----------------------------------|---------------|----------|
| 0 0 0 0                  | 0.000<br>0.000<br>0.000<br>0.000                             | 1.92651                                             | 1.92651               | 1.92651               | 135.313804                       | LS            | 1.00     |
| 0 0 0 5                  | 0.025<br>0.015<br>0.022<br><b>3.092</b>                      | <b>Co 1,2,3</b><br>1.94695<br><b>Co4</b><br>1.99219 | 1.93154               | 1.93154               | 138.720855                       | IS            | 1.03     |
| 5 5 0 0                  | <b>3.099</b><br><b>3.101</b><br>0.037<br>0.031               | <b>Co 1,2</b><br>2.03356<br><b>Co3,4</b><br>1.93090 | 1.99287               | 1.99287               | 142.307949                       | IS            | 1.03     |
| 5 5 5 0                  | <b>3.103</b><br><b>3.093</b><br><b>3.106</b><br>0.058        | <b>Co 1,2,3</b><br>1.99173<br><b>Co4</b><br>1.93859 | 2.02992               | 2.02992               | 145.898236                       | IS            | 1.05     |
| 5 5 5 5                  | <b>3.105</b><br><b>3.097</b><br><b>3.097</b><br><b>3.087</b> | 2.02611                                             | 2.02611               | 2.02611               | 149.522431                       | HS            | 1.00     |

**Table S5. Bandgap calculation of samples.**

|           | Bandgap Eg(eV) | R <sup>2</sup> |
|-----------|----------------|----------------|
| ZCO-300°C | 1.72           | 0.9994         |
| ZCO-400°C | 1.73           | 0.9996         |
| ZCO-500°C | 1.77           | 0.9997         |
| ZCO-600°C | 1.80           | 0.9996         |



**Table S6. Evaluation of photothermal efficiencies of ZnCo<sub>2</sub>O<sub>4</sub>.**

|            | F(J/K) | m(g)   | $\eta_{\text{external}}$ (%) | $\eta_{\text{external-average}}$ (%) | $\eta_{\text{internal}}$ (%) | $\eta_{\text{internal-average}}$ (%) |
|------------|--------|--------|------------------------------|--------------------------------------|------------------------------|--------------------------------------|
| ZCO-300 °C | 1.2E-2 | 0.3472 | 76.2                         | $76.5 \pm 0.3$                       | 79.9                         | $80.2 \pm 0.3$                       |
|            | 1.4E-2 |        | 76.4                         |                                      | 80.1                         |                                      |
|            | 1.2E-2 |        | 76.8                         |                                      | 80.5                         |                                      |
| ZCO-400 °C | 1.1E-2 | 0.3498 | 70.9                         | $71.1 \pm 0.3$                       | 73.7                         | $73.9 \pm 0.3$                       |
|            | 1.2E-2 |        | 70.9                         |                                      | 73.7                         |                                      |
|            | 1.2E-2 |        | 71.5                         |                                      | 74.3                         |                                      |
| ZCO-500 °C | 1.3E-2 | 0.3562 | 66.0                         | $65.9 \pm 0.1$                       | 69.2                         | $69.1 \pm 0.1$                       |
|            | 1.3E-2 |        | 65.9                         |                                      | 69.1                         |                                      |
|            | 1.3E-2 |        | 65.8                         |                                      | 69.0                         |                                      |
| ZCO-600 °C | 1.3E-2 | 0.3542 | 59.4                         | $60.3 \pm 0.9$                       | 62.5                         | $63.4 \pm 0.9$                       |
|            | 1.1E-2 |        | 60.2                         |                                      | 63.3                         |                                      |
|            | 1.3E-2 |        | 61.2                         |                                      | 64.3                         |                                      |

\*  $mC_p \frac{dT}{dt} + F(T - T_0) = 0$   $P_{\text{in}} \cdot \eta = F(T_{\text{eq}} - T_0)$   $C_p(\text{J/g/K}) = 0.385$
